# Supplementary material for: Cholesterol efflux responds to viral load and CD4 counts in HIV+ patients and is dampened in HIV exposed
Source: PubMed Central journal article supplement (PMC6210904; doi:10.1194/jlr.m088153), 2018-09-13
Supplement: supp_M088153_OTort_Sup_TableI_CE_validation.pdf [file supp_M088153_OTort_Sup_TableI_CE_validation.pdf]

**Supplementary Table I. Cholesterol efflux assay validation**

| <b>Batch</b>       | <b>n plates/batch</b> | <b>ABDP</b> | <b>Cholesterol efflux C-</b>   | <b>Real cholesterol efflux C+</b> | <b>n patients</b> | <b>replicates/n</b> | <b>intra-assay CV<sup>s</sup> (between triplicates)</b> | <b>intra-batch CV<sup>#</sup> (inter-plate)</b> |
|--------------------|-----------------------|-------------|--------------------------------|-----------------------------------|-------------------|---------------------|---------------------------------------------------------|-------------------------------------------------|
| <b>1</b>           | 4                     | PL          | 7.4                            | 22.8                              | 24                | triplicates         | 6.3 (0.8-11.7)                                          | 7.9 (7.9-8.0)                                   |
| <b>2</b>           | 4                     | PL          | 8.6                            | 21.5                              | 24                | triplicates         | 6.5 (0.9-15.6)                                          | 6.1 (4.8-7.4)                                   |
| <b>3</b>           | 4                     | PL          | 8.0                            | 24.7                              | 24                | triplicates         | 4.5 (0.9-12.9)                                          | 7.9 (3.4-12.3)                                  |
| <b>4</b>           | 4                     | PL          | 7.4                            | 26.2                              | 24                | triplicates         | 5.5 (1.2-10.6)                                          | 5.8 (4.0-7.5)                                   |
| <b>5</b>           | 5                     | PL          | 7.3                            | 20.7                              | 28                | triplicates         | 4.6 (1.4-8.4)                                           | 7.0 (5.4-8.6)                                   |
| <b>Total Study</b> | <b>21</b>             | <b>PL</b>   | <b>7.7±0.6<sup>&amp;</sup></b> | <b>23.2±2.3<sup>&amp;</sup></b>   | <b>124</b>        | <b>triplicates</b>  | <b>5.5 (4.5-6.5)</b>                                    | <b>6.9 (5.8-9.8)<sup>z</sup></b>                |

ABDS/P, ApoB-depleted serum/plasma; PL, plasma; C-, negative control (no ABDP); positive control (ABDS from a pool of human plasma); CV, coefficient of variation; <sup>s</sup> Intra-assay CV is calculated as the average CV between triplicate values of cholesterol efflux of the same patient. <sup>#</sup> Intra-batch CV is determined as the CV of cholesterol efflux of the negative and positive control between plates in a batch. <sup>&</sup> Mean ± standard deviation. <sup>z</sup> Inter-batch CV assess the dispersion between positive control real cholesterol efflux values (column *Real cholesterol efflux C+*) among batches.
