# Supplementary material for: Cholesterol efflux responds to viral load and CD4 counts in HIV+ patients and is dampened in HIV exposed
Source: PubMed Central journal article supplement (PMC6210904; doi:10.1194/jlr.m088153), 2018-09-13
Supplement: supp_M088153_OTort_Sup_TableII_Charact_StudyParticipants.pdf [file supp_M088153_OTort_Sup_TableII_Charact_StudyParticipants.pdf]

**Supplementary Table II. Characteristics of the study participants in three scenarios**

| Participant characteristics               | Scenario 1                      |                            |    |                      | Scenario 2                        |                                          |    |                      | Scenario 3                       |                                     |    |                      |
|-------------------------------------------|---------------------------------|----------------------------|----|----------------------|-----------------------------------|------------------------------------------|----|----------------------|----------------------------------|-------------------------------------|----|----------------------|
|                                           | UHIV versus EC ( match for CD4) |                            |    |                      | UHIV versus UHIV ( match for CD4) |                                          |    |                      | UHIV versus UHIV ( match for VL) |                                     |    |                      |
|                                           | EC (n= 8)                       | UHIV, CD4 match 1:1 (n= 8) | n  | p-value <sup>£</sup> | UHIV low VL (n= 8)                | UHIV high VL, CD4 matched 1:1 CD4 (n= 8) | n  | p-value <sup>£</sup> | UHIV high CD4 (n= 8)             | UHIV low CD4, VL matched 1:1 (n= 8) | n  | p-value <sup>£</sup> |
| Age, years <sup>§</sup>                   | 39 (28-55)                      | 36 (33-40)                 | 16 | ns (0.290)           | 38 (35-43)                        | 34 (29-40)                               | 16 | ns (0.175)           | 36 (31-37)                       | 33 (29-38)                          | 16 | ns (0.60)            |
| Male/Female, n male (%)                   | 5/3 (63)                        | 8/0 (100)                  | 16 | N/A                  | 8/0 (100)                         | 7/1 (88)                                 | 16 | N/A                  | 8/0 (100)                        | 7/1 (88)                            | 16 | N/A                  |
| MSM <sup>&amp;</sup> /Other, n MSM (%)    | 6/2 (75)                        | 8/0 (100)                  | 16 | N/A                  | 7/1 (88)                          | 7/1 (88)                                 | 16 | ns (1)               | 7/1 (88)                         | 6/2 (75)                            | 16 | ns (1)               |
| Plasma viral load (log10) <sup>§</sup>    | 1.57 (1.57-1.86)                | 4.3 (4.0-4.6)              | 16 | ** (0.0078)          | 3.0 (2.6-3.5)                     | 4.6 (4.1-5.4)                            | 16 | ** (0.0002)          | 4.33                             | 4.29                                | 16 | ns (0.283)           |
| CD4+ T-cell count (cells/ml) <sup>§</sup> | 549 (489-642)                   | 545 (461-653)              | 16 | ns (0.195)           | 510 (355-842)                     | 516 (357-849)                            | 16 | ns (0.377)           | 734 (618-858)                    | 267 (149-404)                       | 16 | ** (0.001)           |
| CD8+ T-cell count (cells/ml) <sup>§</sup> | 793 (601-1052)                  | 960 (790-1031)             | 16 | ns (0.641)           | 616 (535-1035)                    | 1079 (858-1315)                          | 16 | ns (0.383)           | 1052 (859-1156)                  | 851 (516-1364)                      | 16 | ns (0.148)           |
| Ratio <sup>§</sup> CD4+/CD8+              | 0.76 (0.61-1.02)                | 0.57 (0.52-0.82)           | 16 | ns (0.273)           | 0.78 (0.42-1.18)                  | 0.51 (0.26-0.84)                         | 16 | ns (0.155)           | 0.78 (0.54-0.92)                 | 0.24 (0.20-0.49)                    | 16 | ns (0.109)           |
| <b>Biochemistry<sup>¥</sup>:</b>          |                                 |                            |    |                      |                                   |                                          |    |                      |                                  |                                     |    |                      |
| Total cholesterol (mg/dL)                 | 208.8±51.0                      | 159.9±26.1                 | 16 | ns (0.090)           | 183.5±38.1                        | 172.0±42.3                               | 16 | ns (0.667)           | 162.4±27.3                       | 163.3±18.4                          | 16 | ns (0.947)           |
| Triglycerides (mg/dL)                     | 137.9±78.5                      | 167.8±161.4                | 16 | ns (1.000)           | 111.1±33.6                        | 189.0±117.8                              | 16 | ns (0.383)           | 158.4±111.5                      | 108.4±77.8                          | 16 | Ns (0.25)            |
| HDL-C (mg/dL)                             | 48.6±12.1                       | 44.1±10.1                  | 16 | ns (0.440)           | 42.8±5.7                          | 41.4±11.2                                | 16 | ns (0.712)           | 40.3±10.1                        | 41.5±9.1                            | 16 | Ns (0.82)            |
| LDL-C (mg/dL)                             | 134.2±43.1                      | 87.4±18.5                  | 12 | ns                   | 118.5±32.4                        | 101.0±32.1                               | 15 | ns                   | 96.3±24.1                        | 102.1±18.4                          | 12 | ns                   |

|                                        |            |           |    |               |           |            |    |               |            |            |    |               |
|----------------------------------------|------------|-----------|----|---------------|-----------|------------|----|---------------|------------|------------|----|---------------|
|                                        |            |           |    | (0.313)       |           |            |    | (0.937)       |            |            |    | (0.927)       |
| ApoAI (mg/dL)                          | 120.5±21.0 | 110.0±9.7 | 16 | ns<br>(0.256) | 113.4±7.9 | 113.0±17.7 | 16 | ns<br>(0.960) | 108.6±10.7 | 114.4±11.2 | 16 | ns<br>(0.335) |
| ApoB (mg/dL)                           | 103.1±22.1 | 71.9±13.0 | 16 | *<br>(0.025)  | 94.8±19.1 | 83.9±19.3  | 16 | ns<br>(0.378) | 40.3±10.1  | 41.5±9.1   | 16 | ns<br>(0.816) |
| ApoB/ApoAI                             | 0.86±0.14  | 0.66±0.16 | 16 | *<br>(0.034)  | 0.83±0.14 | 0.75±0.15  | 16 | ns<br>(0.275) | 0.74±0.14  | 0.73±0.18  | 16 | ns<br>(0.922) |
| Lp(a) (log10)                          | 1.18±0.40  | 0.90±0.33 | 16 | ns<br>(0.250) | 1.42±0.45 | 1.08±0.46  | 16 | ns<br>(0.114) | 1.15±0.40  | 1.43±0.46  | 16 | ns<br>(0.243) |
| hsCRP                                  | 0.32±0.29  | 0.12±0.07 | 16 | ns<br>(0.148) | 0.62±1.11 | 0.30±0.29  | 16 | ns<br>(1.00)  | 0.18±0.16  | 0.27±0.36  | 16 | ns<br>(0.945) |
| Cholesterol<br>efflux                  | 0.88±0.25  | 0.78±0.10 | 16 | ns<br>(0.361) | 0.69±0.13 | 0.70±0.17  | 16 | ns<br>(0.814) | 0.76±0.12  | 0.58±0.13  | 16 | ns<br>(0.054) |
| Cholesterol<br>efflux/ApoAI<br>(x1000) | 7.41±2.30  | 7.16±1.25 | 16 | ns<br>(0.813) | 6.10±1.24 | 6.29±1.69  | 16 | ns<br>(0.783) | 7.12±1.22  | 5.17±1.13  | 16 | *<br>(0.027)  |

UHIV, untreated HIV infected patients; EC, elite controllers; Lp(a), lipoprotein(a); hsCRP; high-sensitive C-reactive protein; N/A, not applicable;

<sup>‡</sup>Paired t-test (Wilcoxon signed rank test for non-parametric variables and Paired t-test for normal distribution); N/A, not applicable; ns, non-significant; \* p< 0.05; \*\* p< 0.01; \*\*\* p<0.0001.

<sup>§</sup>Data shown median (IQR, 25<sup>th</sup> – 75<sup>th</sup> percentile);

<sup>‡</sup>Data shown as mean ± standard deviation.

CD4+ T-cell count and VL had an effective pairing (\*\*\*).
