# Supplementary material for: Cholesterol efflux responds to viral load and CD4 counts in HIV+ patients and is dampened in HIV exposed
Source: PubMed Central journal article supplement (PMC6210904; doi:10.1194/jlr.m088153), 2018-09-13
Supplement: supp_M088153_OTort_Sup_TableIII_HESNvsHC.pdf [file supp_M088153_OTort_Sup_TableIII_HESNvsHC.pdf]

**Supplementary Table III. Characteristics of HC and HESN**

| <b>Participant characteristics</b>                 | <b>HC<br/>(n=14)</b> | <b>HESN<br/>(n= 32)</b> | <b>n</b> | <b>p-value<sup>‡</sup></b> |
|----------------------------------------------------|----------------------|-------------------------|----------|----------------------------|
| Age, years <sup>§</sup>                            | 33 (26-40)           | 36 (32-42)              | 46       | ns (0.253)                 |
| Male/Female, n male (%)                            | 5/9 (36)             | 27/5 (84)               | 46       | * (0.028)                  |
| <b>Clinical data:</b>                              |                      |                         |          |                            |
| Presumed mode of HIV transmission/exposure, n (%): |                      |                         | 46       | N/A                        |
| MSM <sup>&amp;</sup>                               | N/D                  | 27 (84)                 |          |                            |
| Other                                              | N/D                  | 5 (16)                  |          |                            |
| <b>Biochemistry<sup>¥</sup>:</b>                   |                      |                         |          |                            |
| Total cholesterol (mg/dL)                          | 175.7±26.6           | 191.4±37.2              | 46       | * (0.161)                  |
| Triglycerides (mg/dL)                              | 84.9±42.2            | 106.1±58.3              | 46       | ns (0.252)                 |
| HDL-C (mg/dL)                                      | 60.4±11.7            | 50.9±12.1               | 46       | * (0.017)                  |
| LDL-C (mg/dL)                                      | 98.4±25.0            | 119.9±30.9              | 43       | * (0.029)                  |
| ApoAI (mg/dL)                                      | 132.6±13.7           | 128.3±16.4              | 46       | ns (0.403)                 |
| ApoB (mg/dL)                                       | 87.6±23.0            | 89.8±20.4               | 46       | ns (0.739)                 |
| ApoB/ApoAI                                         | 0.67±0.18            | 0.71±0.16               | 46       | ns (0.457)                 |
| Lp(a) (log10)                                      | 1.05±0.51            | 1.29±0.49               | 46       | ns (0.142)                 |
| hsCRP                                              | 0.14±0.14            | 0.20±0.31               | 46       | ns (0.792)                 |
| Cholesterol efflux                                 | 0.90±0.13            | 0.78±0.14               | 46       | ** (0.009)                 |
| Cholesterol efflux/ApoAI (x1000)                   | 6.82±0.95            | 6.16±1.37               | 46       | * (0.023)                  |

HC, healthy control individuals; HESN, HIV-exposed seronegative; Lp(a), lipoprotein(a); hsCRP; high-sensitive C-reactive protein; N/D, not determined; N/A, not applicable.

<sup>‡</sup>T-test for normal distributed variables and Kruskal-Wallis test for non-parametric variables; \*\* p<0.01; \* p<0.05.

<sup>§</sup>Data shown median (IQR, 25<sup>th</sup> – 75<sup>th</sup> percentile);

<sup>¥</sup>Data shown as mean ± standard deviation.
